# Supplementary material for: The Use of Mixed Effects Models for Obtaining Low-Cost Ecosystem Carbon Stock Estimates in Mangroves of the Asia-Pacific
Source: PLoS One. 2017 Jan 9;12(1):e0169096. doi: 10.1371/journal.pone.0169096 (PMC5222395; doi:10.1371/journal.pone.0169096)
Supplement: S4 File — An R script providing the details of the statistical analyses is provided in this file. The script is provided in hopes of improving transparency and the application of our models to future datasets. (R) [file pone.0169096.s004.r]

###################################################################
###################################################################
##                                                               ##
##   The following R script provides the multiple linear mixed   ##
##   effects models described in the associated PLoS One         ##
##   manuscript, Bukoski et al., 2016.                           ##
##                                                               ##
##   The intention of the provided R script is to show the       ##
##   model structure and allow for recreation of model           ##
##   diagnostics and the publication figures. The necessary      ##

##   code for the importing and pre-processing of the dataset    ##
##   (i.e., subsetting the data to only include relevant         ##
##   observations) is not included here. Some adjustment of      ##
##   dataframe names, column names, and other parameters will    ##
##   need to be adjusted to rerun the script. However, if the    ##
##   dataframe is constructed to match the parameter names we    ##
##   use, the script can be run more efficiently. We have also   ##
##   provided the code to reproduce the figures of the study     ##
##   as well.                                                    ##
##                                                               ##
###################################################################
###################################################################

#------------------------------------------------------------------
# Load the necessary packages. If the packages are not installed on
# your local machine, you can install them via install.packages()

package_list = c("cowplot", "ggplot2", "hydroGOF", "MuMIn", "nlme")
new_packages = package_list[!(package_list %in% installed.packages()[,"Package"])]
if(length(new_packages)) install.packages(new_packages)

# Load the necessary packages

lapply(package_list, require, character.only = TRUE)

#--------------#####################################--------------#
               ##                                 ##
               ##     Mangrove biomass model      ##
               ##                                 ##
#--------------#####################################--------------#

# Fit the biomass model

lme.biomass <- lme(Biomass ~ Basal.area*Latitude - Latitude, random = ~1|Site,
            weights=varIdent(form = ~Latitude|Site), data=param.bas, control=ctrl)

# Look at model diagnostics

summary(lme.biomass)
lme.C.density$apVar
r.squaredGLMM(lme.biomass)
intervals(lme.biomass)

# Adjust data for plotting

results = as.data.frame(lme.full$fitted)
results = cbind(round(results,1), param.bas$Biomass, param.bas$Cntry)
colnames(results) = c("Fixed", "Mixed", "Observed", "Location")
results = as.data.frame(results)

# Plot Observed vs. Predicted for fixed effects only

biomass.plot.fe = ggplot(results, aes(Fixed, Observed)) + 
  geom_point() + 
  scale_shape_manual(values=c(1:25,33:63)) + 
  theme_bw() + geom_abline(col="red") + 
  xlab("Predicted Biomass Carbon (Mg C/ha)") +
  ylab("Observed Biomass (Mg C/ha)") +
  theme(axis.text=element_text(size=14))

# Plot Observed vs. Predicted for fixed + random effects

biomass.plot.re = ggplot(results, aes(Mixed, Observed)) + 
  geom_point() + 
  scale_shape_manual(values=c(1:25,33:63)) + 
  theme_bw() + geom_abline(col="red") + 
  xlab("Predicted Biomass C (Mg C/ha)") +
  ylab("Observed Biomass C (Mg C/ha)") + 
  theme(axis.text=element_text(size=14))

# Grid the plots

plot_grid(biomass.plot.fe, biomass.plot.re, ncol=2)


#--------------#####################################--------------#
               ##                                 ##
               ##    Soil organic carbon model    ##
               ##                                 ##
#--------------#####################################--------------#

# Fit the soil organic C model

lme.C.density <- lme((C.density) ~ log(Latitude) + log(Basal.area), random=~1|Site,
                     weights = varPower(form=~log(Latitude)),
                     method = "REML", data=model.c.dens, 
                     control = ctrl, na.action = "na.omit")

# Look at model diagnostics

summary(lme.C.density)
lme.C.density$apVar
r.squaredGLMM(lme.C.density)
intervals(lme.C.density)

# Adjust data for plotting

results.soil = as.data.frame(lme.C.density$fitted)
results.soil = cbind(round(results.soil,1), model.c.dens$C.density, model.c.dens$Site)
colnames(results.soil) = c("Fixed", "Mixed", "Observed", "Site")
results = as.data.frame(results.soil)

# Plot Observed vs. Predicted for fixed effects only

final.soil.plot.fe = ggplot(results.soil, aes(Fixed, Observed)) + 
  geom_point() + 
  scale_shape_manual(values=c(1:25,64)) +
  theme_bw() + geom_abline(col="red") +
  ylab(expression(paste('Observed SOC (mg C/cm'^3, ")", sep=""))) +
  xlab(expression(paste('Predicted SOC (mg C/cm'^3, ")", sep=""))) +
  theme(axis.text=element_text(size=14))

# Plot Observed vs. Predicted for fixed + random effects

final.soil.plot.re = ggplot(results.soil, aes(Mixed, Observed)) + 
  geom_point() + 
  scale_shape_manual(values=c(1:25,64)) +
  theme_bw() + geom_abline(col="red") + 
  ylab(expression(paste('Observed SOC (mg C/cm'^3, ")", sep=""))) +
  xlab(expression(paste('Predicted SOC (mg C/cm'^3, ")", sep=""))) +
  theme(axis.text=element_text(size=14))

# Grid the plots

plot_grid(soil.plot.fe, soil.plot.re, ncol=2)
